# Supplementary material for: The downside of metabolic diversity: Postingestive rearrangements by specialized insects
Source: PubMed Central journal article supplement (PMC9214519; doi:10.1073/pnas.2122808119), 2022-06-06
Supplement: pnas.2122808119.sapp.pdf [file pnas.2122808119.sapp.pdf]

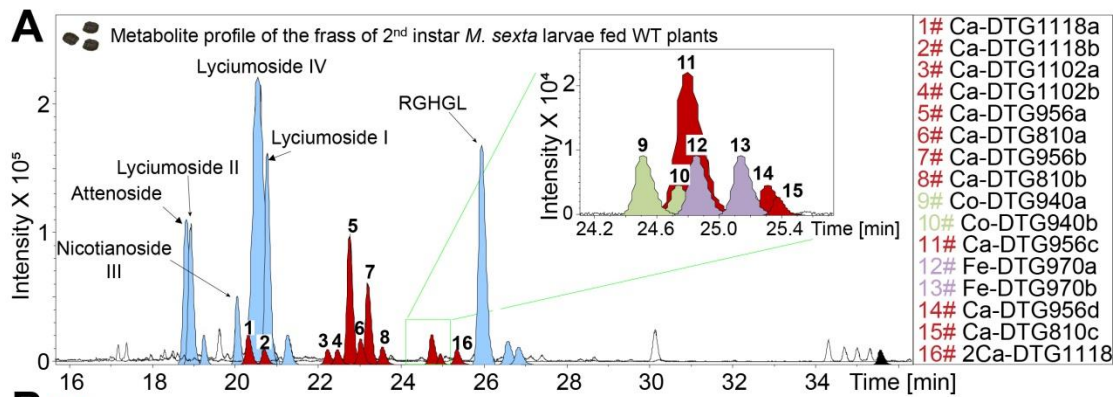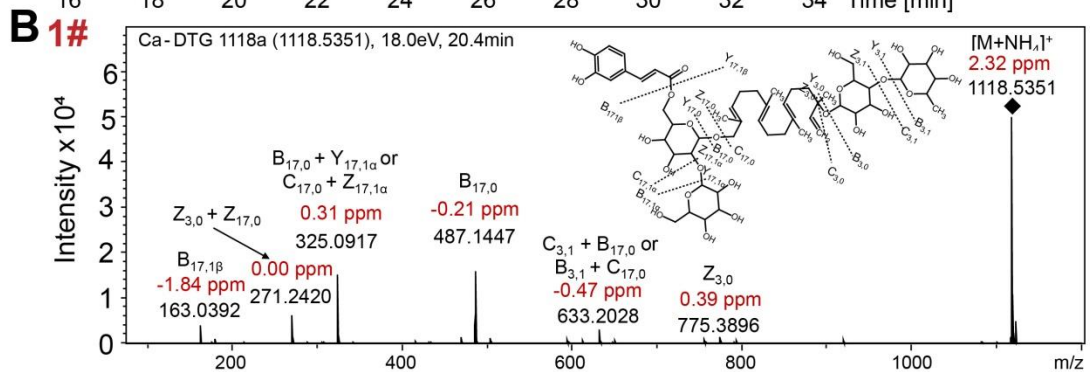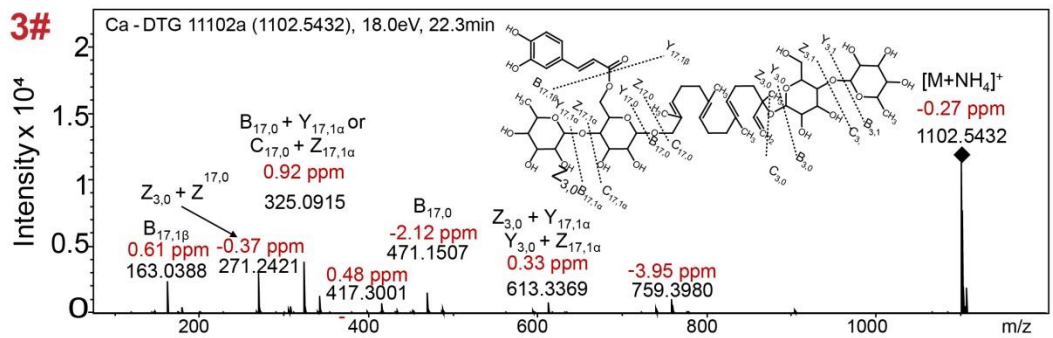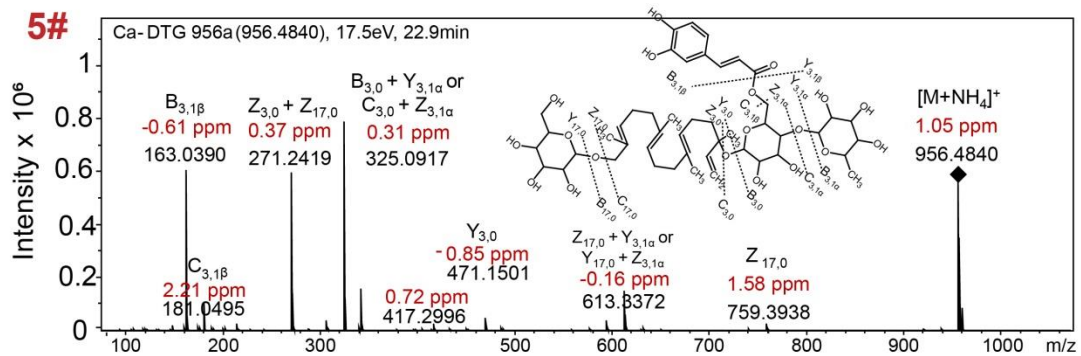

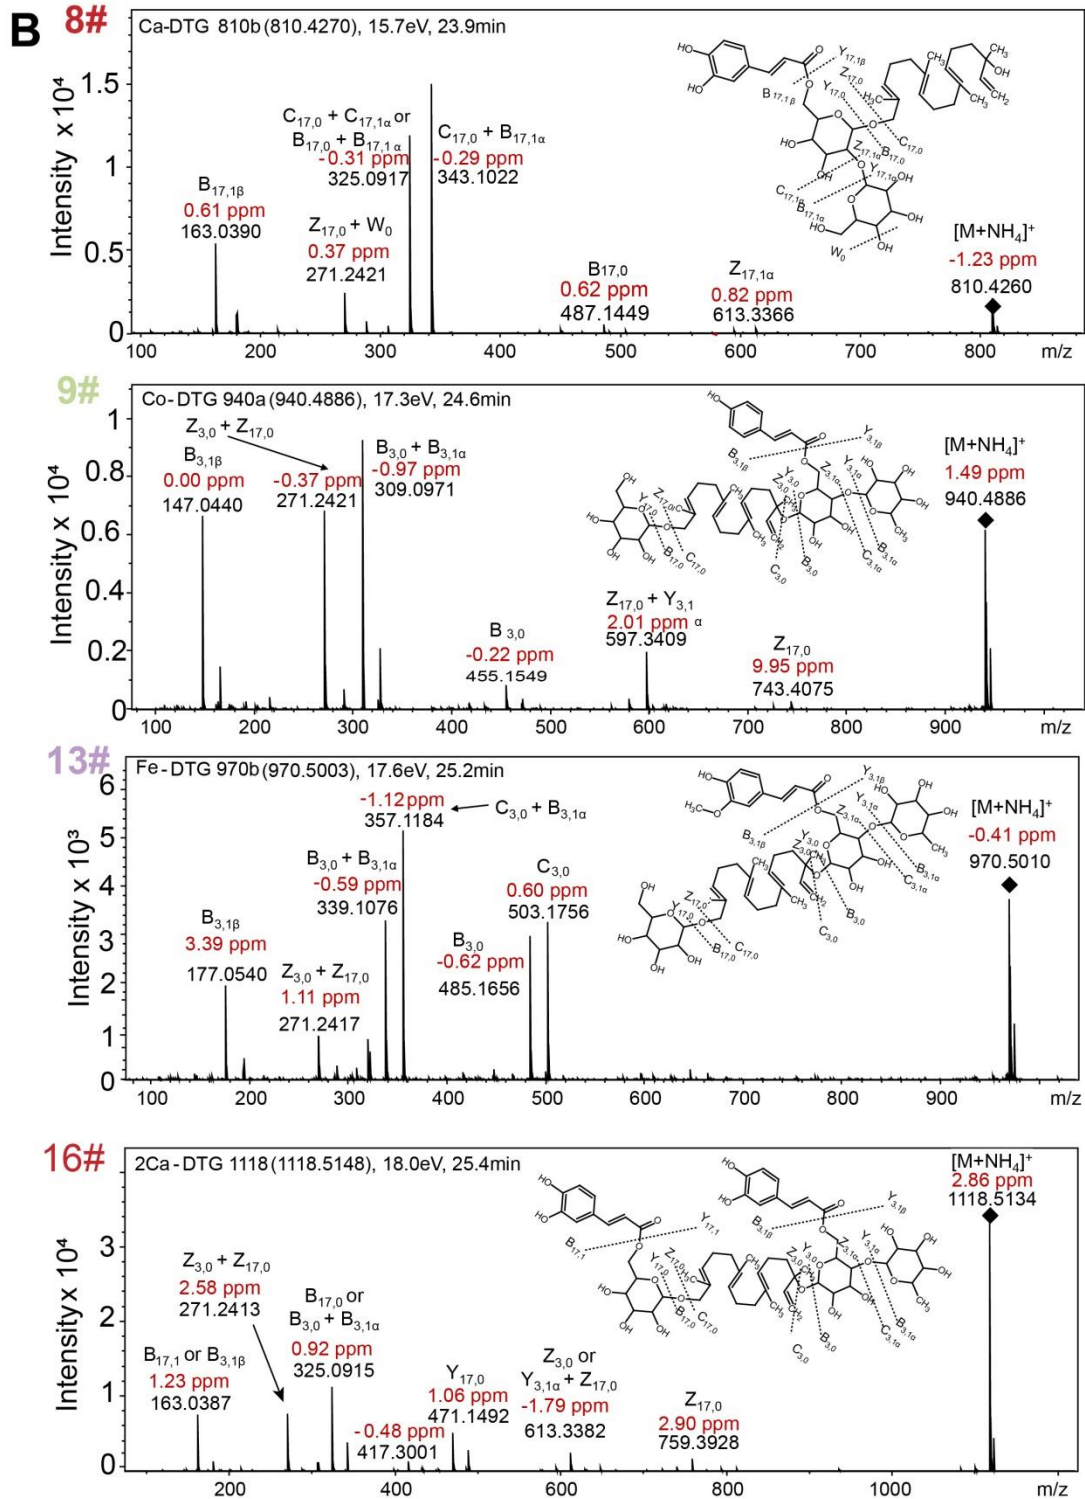

**Figure S1: Characterization and annotation of novel HC-HGL-DTGs via MS/MS in the frass of *M. sexta* larvae fed WT *N. attenuata* plants**

(A) EIC traces of *m/z* 271.2420 for the 17-HGL aglycone representing the metabolic decoration of the HGL-DTG profile in the frass of *M. sexta* larvae fed WT *N. attenuata* plants. Novel hydroxycinnamoylated HGL-DTG (HC-HGL-DTG) products are highlighted in red, green and purple for caffeoylated HGL-DTGs (Ca-DTGs), coumaroylated HGL-DTGs (Co-DTGs) and feruloylated HGL-DTGs (Fe-DTGs), respectively. The 16 detected HC-HGL-DTGs are numbered

following their retention times. The number in their name, such as the “1118” in compound 1#, indicates the  $m/z$  of the ammonium adducts. Different isomers are distinguished by a suffix, such as the “a” in compound 1#. **(B)** The associated MS/MS spectra for selected de-glycosylation products and HC-HGL-DTGs are displayed. A putative structure is assigned to all selected compounds and the fragmentation scheme is explained via the predicted neutral losses from the ammonium adduct of the molecular ion  $[M+NH_4]^+$ .

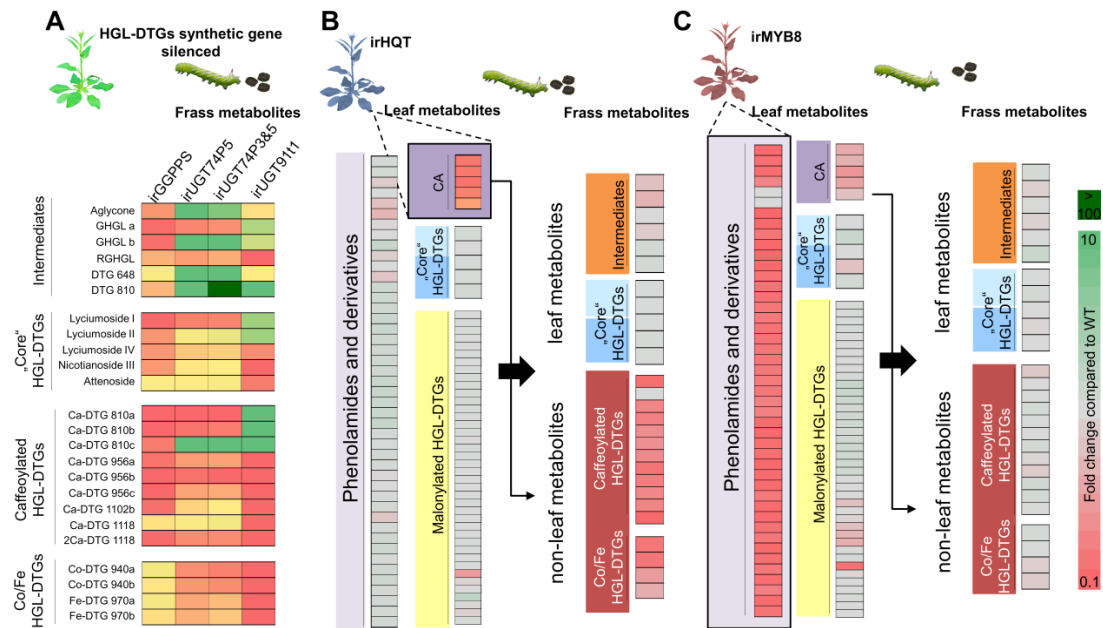

**Figure S2. The HC-HGL-DTGs discovered in the frass of *M. sexta* larvae originate from ingested HGL-DTGs and CA in leaves**

(A) Heat map of HGL-DTG-related metabolites in the frass of *M. sexta* larvae that fed on different previously published HGL-DTG biosynthetic gene-silenced plants: irGGPPS plants are silenced in total HGL-DTG accumulations; irUGT74P5, irUGT74P3&5, and irUGT91T1 are silenced in different combinations of the UGTs that add glucose residues to the diterpene backbone during HGL-DTG biosynthesis. Metabolites in *N. attenuata* leaves (left) and frass (right) of *M. sexta* that fed on irHQT plants, which are silenced in CA biosynthesis (B) and irMYB8 plants, which are silenced in a TF that regulates phenolamide biosynthesis (C).

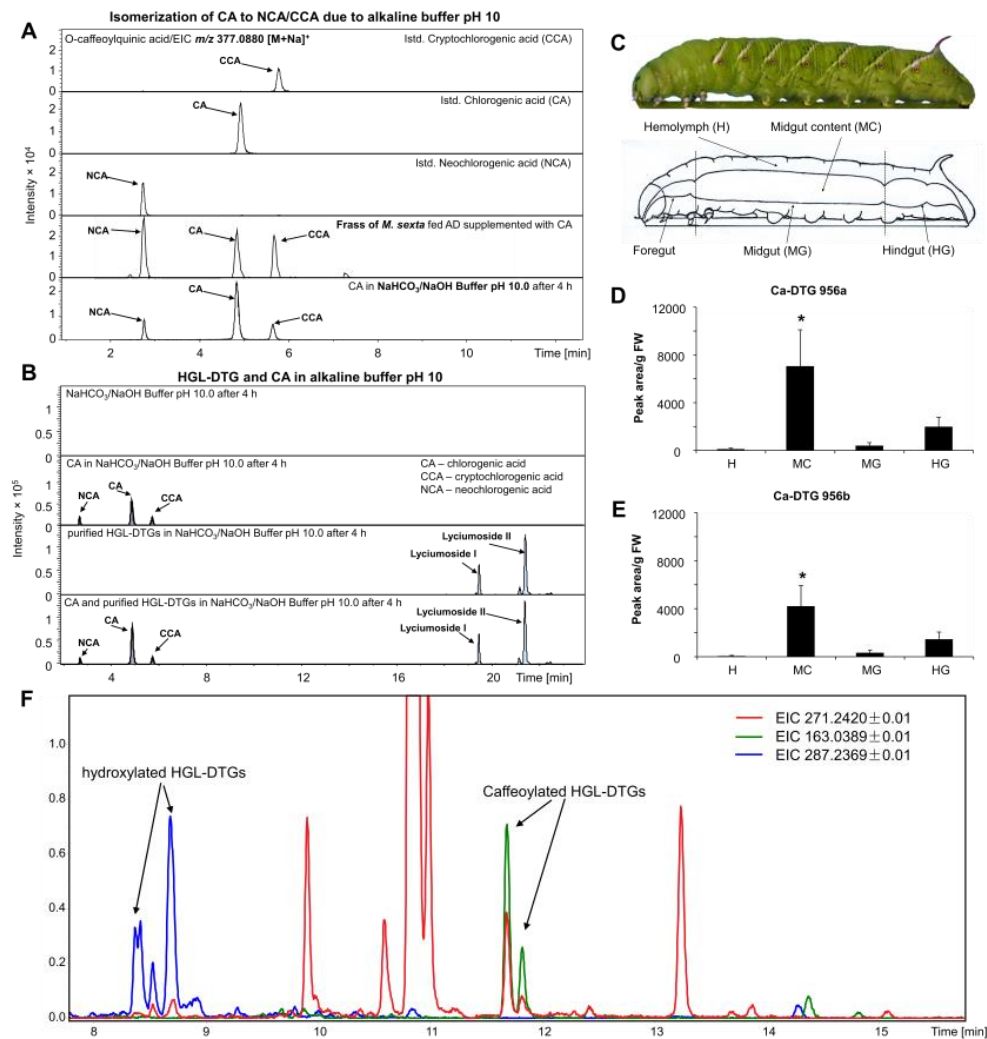

**Figure S3: Isomerization and localization of caffeoylated HGL-DTGs in *M. sexta* larvae**

(A) CA will isomerize into cryptochlorogenic acid (CCA) and neochlorogenic acid (NCA) in alkaline sodium carbonate buffers (pH = 10) and in the guts of *M. sexta* larvae. (B) Other than the isomerization of CA s, no additional non-catalytic reactions were detected when CA and HGL-DTGs were combined in alkaline buffers. (C) Schema of the different parts sampled from *M. sexta* larvae that included hemolymph (H), midgut (MG) and hindgut (HG) tissues, as well as the midgut content (MC). The relative abundances (mean + SE,  $n = 4$ ) of caffeoylated HGL-DTG 5# (Ca-DTG 956a, D) and caffeoylated HGL-DTG 7# (Ca-DTG 956b, E) in different parts of 4<sup>th</sup> instar *M. sexta* larvae that fed on *N. attenuata* plants. The annotations of the two compounds are shown in Figure S1. (F) EIC traces of  $m/z$  271.2420 (aglycone fragment of HGL-DTGs),  $m/z$  163.0389 (caffeoyl fragment) and  $m/z$  287.2369 (aglycone fragment of hydroxylated HGL-DTGs) representing the metabolic profile in the frass of *M. sexta* larvae fed WT *N. attenuata* plants. The lack of co-eluting peak signals of EIC  $m/z$  163.0389 and  $m/z$  287.2369 reveals the absence of hydroxylated HC-HGL-DTGs. Asterisks indicate significantly different tissues concentrations (\*,  $P < 0.05$ , one-way ANOVA followed by Tukey's HSD *post-hoc* tests).

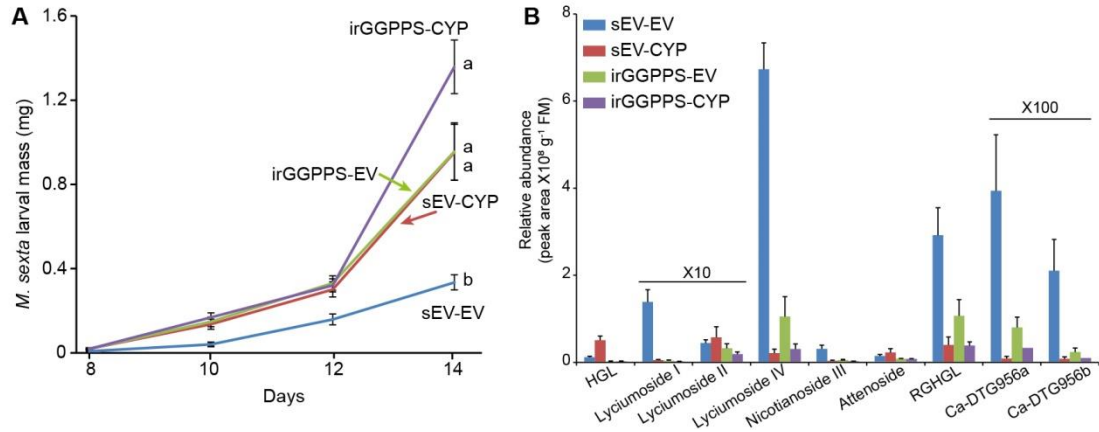

**Figure S4. Silencing HGL-DTG biosynthetic genes affect *M. sexta* performance and HGL-DTG frass profiles of caterpillars fed these silenced plants**

(A) VIGS vectors with a fragment of the HGL-DTGs biosynthetic gene *NaCYP736A* (CYP) and the empty vector (EV) were independently infiltrated into the stably transformed plants, irGGPPS and empty vector (stably transformed EV, sEV). Mass (mean  $\pm$  SE,  $n = 10-14$ ) of *M. sexta* larvae fed different plants were determined at the indicated times. (B) The abundance (mean  $\pm$  SE,  $n = 6$ ) of HGL-DTG-related metabolites in the frass of *M. sexta* larvae that fed on indicated plants. “X10” and “X100” above some metabolites indicate 10- and 100-fold magnifications of the intensities to enhance visibility. Different letters indicate significantly different tissues concentrations (\*,  $P < 0.05$ , one-way ANOVA followed by Tukey’s HSD *post-hoc* tests).

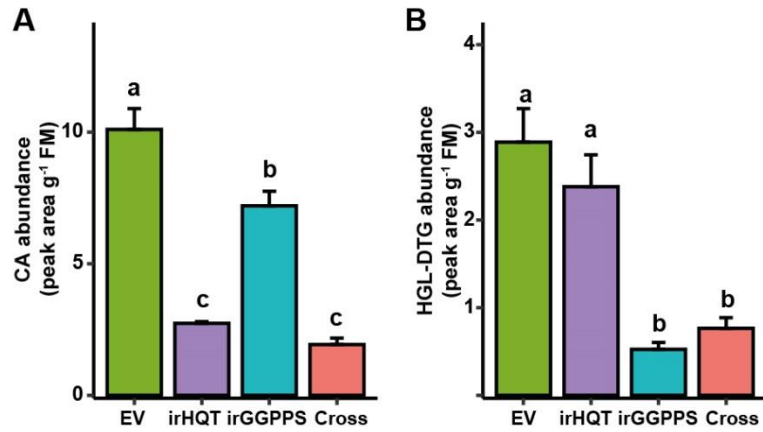

**Figure S5. The abundance of CA and HGL-DTGs in the leaves of different transgenic plants**  
 The relative abundances (mean + SE,  $n = 5$ ) of CA (**A**) and HGL-DTGs (**B**) in the leaves of hemizygous irHQT, the hemizygous irGGPPS and the hemizygous Cross plants, with the homozygous empty vector- transformed (EV) as control. Different letters indicate significant differences ( $P < 0.05$ , one-way ANOVA followed by Tukey's *post-hoc* test).

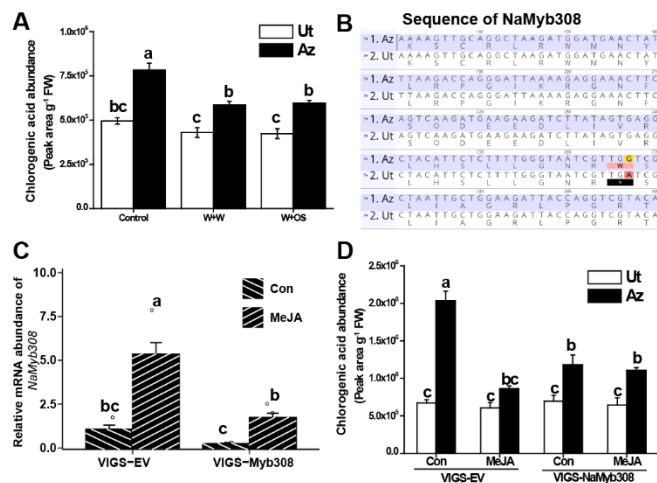

**Figure S6. NaMyb308 contributes to different accumulations of CA between Ut and Az accessions**

(A) Relative abundance (mean ± SE,  $n = 5$ ) of chlorogenic acid (CA) in the leaves of Ut and Az *N. attenuata* accession plants that were elicited by treating freshly produced puncture wounds in leaves with water (W+W) or oral secretion of *M. sexta* larvae (W+OS). (B) Sequence comparisons of the NaMyb308 in Ut and Az. A single nucleotide difference at position +267 leads to a premature stop codon in the Ut accession. (C) Relative mRNA abundance (mean + SE,  $n = 4-5$ ) of *NaMyb308* in the control (Con) or MeJA-treated (MeJA) leaves on Az VIGS plants. VIGS of *NaMyb308* (VIGS-Myb308) versus a control VIGS empty vector (VIGS-EV) were infiltrated in Az plants. (D) Relative abundance (mean + SE,  $n = 4-5$ ) of CA in control or MeJA-treated Ut and Az VIGS plants. Different letters indicate significant differences among different transgenic plants ( $p < 0.05$ , one-way ANOVA followed by Tukey's HSD *post-hoc* tests).



Table S1. DNA primers used in this study.

| Name         | Sequence (5'-3')                          | Purpose        |
|--------------|-------------------------------------------|----------------|
| NaMyb308-v-F | <u>GCGGCGGTCGACTTACATTGAGTACTGCTACTTG</u> | VIGS construct |
| NaMyb308-v-R | <u>GCGGCGGGATCCGATTTTGCTCCTTTTGAT</u>     | VIGS construct |
| NaMyb308-q-F | TGTGCTGGAATTGAACCAAACC                    | RT-qPCR        |
| NaMyb308-q-R | GATGGGCTTCGGGGCAAATA                      | RT-qPCR        |
| NaIF5a-q-F   | GTCGGACGAAGAACACCATT                      | RT-qPCR        |
| NaIF5a-q-R   | CACATCACAGTTGTGGGAGG                      | RT-qPCR        |
